# Supplementary material for: Novel blood-based microRNA biomarker panel for early diagnosis of chronic pancreatitis
Source: PubMed Central journal article supplement (PMC5225423; doi:10.1038/srep40019), 2017-01-11

## **Supplementary Files**

### **Novel blood-based microRNA biomarker panel for early diagnosis of chronic pancreatitis**

Lei Xin<sup>1\*</sup>, M.D., Jun Gao<sup>1\*</sup>, Ph.D., Dan Wang<sup>1\*</sup>, M.D., Jin-Huan Lin<sup>1</sup>, M.D., Zhuan Liao<sup>1</sup>, M.D., Jun-Tao Ji<sup>1</sup>, M.D., Ting-Ting Du<sup>1</sup>, M.D., Fei Jiang<sup>1</sup>, M.D., Liang-Hao Hu<sup>1</sup>, M.D., Zhao-Shen Li<sup>1</sup>, M.D.

<sup>1</sup>Department of Gastroenterology, Changhai Hospital, the Second Military Medical University, Shanghai, China

\* Dr. Xin, Dr. Gao and Dr. Wang contributed equally to this work.

## Supplementary Tables

| GOID       | Ontology | Term                                                                        | P-value   |
|------------|----------|-----------------------------------------------------------------------------|-----------|
| GO:0003835 | MF       | beta-galactoside alpha-2,6-sialyltransferase activity                       | 2.69E-15  |
| GO:0019778 | MF       | APG12 activating enzyme activity                                            | 1.64E-06  |
| GO:0008234 | MF       | cysteine-type peptidase activity                                            | 3.17E-06  |
| GO:0004839 | MF       | ubiquitin activating enzyme activity                                        | 3.18E-06  |
| GO:0034596 | MF       | phosphatidylinositol phosphate 4-phosphatase activity                       | 4.94E-06  |
| GO:0003906 | MF       | DNA-(apurinic or apyrimidinic site) lyase activity                          | 1.12E-05  |
| GO:0008373 | MF       | sialyltransferase activity                                                  | 2.94E-05  |
| GO:0044020 | MF       | histone methyltransferase activity (H4-R3 specific)                         | 8.37E-05  |
| GO:0016765 | MF       | transferase activity, transferring alkyl or aryl (other than methyl) groups | 0.000152  |
| GO:0016316 | MF       | phosphatidylinositol-3,4-bisphosphate 4-phosphatase activity                | 0.000358  |
| GO:0034593 | MF       | phosphatidylinositol bisphosphate phosphatase activity                      | 0.0007102 |
| GO:0019104 | MF       | DNA N-glycosylase activity                                                  | 0.0009819 |
| GO:0008281 | MF       | sulfonylurea receptor activity                                              | 0.0009956 |
| GO:0042611 | CC       | MHC protein complex                                                         | 3.17E-06  |
| GO:0030870 | CC       | Mre11 complex                                                               | 4.94E-06  |
| GO:0030427 | CC       | site of polarized growth                                                    | 5.90E-06  |
| GO:0044421 | CC       | extracellular region part                                                   | 9.66E-06  |
| GO:0005576 | CC       | extracellular region                                                        | 1.12E-05  |
| GO:0030426 | CC       | growth cone                                                                 | 1.15E-05  |
| GO:0044459 | CC       | plasma membrane part                                                        | 8.11E-05  |
| GO:0044295 | CC       | axonal growth cone                                                          | 9.83E-05  |
| GO:0030016 | CC       | myofibril                                                                   | 0.000288  |
| GO:0043292 | CC       | contractile fiber                                                           | 0.0002918 |
| GO:0005615 | CC       | extracellular space                                                         | 0.000358  |
| GO:0005744 | CC       | mitochondrial inner membrane presequence translocase complex                | 0.000358  |
| GO:0032501 | BP       | multicellular organismal process                                            | 1.97E-06  |
| GO:0006305 | BP       | DNA alkylation                                                              | 3.17E-06  |
| GO:0006306 | BP       | DNA methylation                                                             | 3.17E-06  |

|            |    |                                              |           |
|------------|----|----------------------------------------------|-----------|
| GO:0060561 | BP | apoptotic process involved in morphogenesis  | 9.66E-06  |
| GO:0016486 | BP | peptide hormone processing                   | 1.15E-05  |
| GO:0043067 | BP | regulation of programmed cell death          | 1.47E-05  |
| GO:0042981 | BP | regulation of apoptotic process              | 1.56E-05  |
| GO:0072023 | BP | thick ascending limb development             | 2.94E-05  |
| GO:0072233 | BP | metanephric thick ascending limb development | 2.94E-05  |
| GO:0050896 | BP | response to stimulus                         | 2.99E-05  |
| GO:0010623 | BP | developmental programmed cell death          | 3.27E-05  |
| GO:0044728 | BP | DNA methylation or demethylation             | 3.51E-05  |
| GO:0007588 | BP | excretion                                    | 5.45E-05  |
| GO:0044707 | BP | single-multicellular organism process        | 6.82E-05  |
| GO:0010941 | BP | regulation of cell death                     | 7.68E-05  |
| GO:0006914 | BP | autophagy                                    | 0.0001079 |
| GO:0021859 | BP | pyramidal neuron differentiation             | 0.0001379 |
| GO:0021860 | BP | pyramidal neuron development                 | 0.0001379 |
| GO:0072021 | BP | ascending thin limb development              | 0.0001977 |
| GO:0072218 | BP | metanephric ascending thin limb development  | 0.0001977 |
| GO:0003407 | BP | neural retina development                    | 0.0002895 |
| GO:0006304 | BP | DNA modification                             | 0.0003002 |
| GO:0003285 | BP | septum secundum development                  | 0.000358  |
| GO:0050808 | BP | synapse organization                         | 0.000425  |
| GO:0051491 | BP | positive regulation of filopodium assembly   | 0.000425  |
| GO:0051023 | BP | regulation of immunoglobulin secretion       | 0.0005942 |
| GO:0000244 | BP | assembly of spliceosomal tri-snRNP           | 0.000743  |
| GO:0072236 | BP | metanephric loop of Henle development        | 0.000743  |
| GO:0051489 | BP | regulation of filopodium assembly            | 0.0007666 |

\*BP: biological\_process; CC: cellular\_component; MF: molecular\_function

**Supplementary Table S1. GO functional enrichment for the targets of DEmiRs in early CP**

| GOID       | Ontology | Term                                                  | Level | MIN-p-value | MAX-p-value | AVG-p-value |
|------------|----------|-------------------------------------------------------|-------|-------------|-------------|-------------|
| GO:0042611 | CC       | MHC protein complex                                   | 6     | 1.6066E-33  | 3.167E-06   | 1.583E-06   |
| GO:0044421 | CC       | extracellular region part                             | 2     | 5.22874E-85 | 9.662E-06   | 4.831E-06   |
| GO:0005576 | CC       | extracellular region                                  | 1     | 1.59705E-94 | 1.121E-05   | 5.604E-06   |
| GO:0044459 | CC       | plasma membrane part                                  | 5     | 8.06328E-69 | 8.113E-05   | 4.056E-05   |
| GO:0030016 | CC       | myofibril                                             | 8     | 1.85948E-31 | 0.000288    | 0.000144    |
| GO:0043292 | CC       | contractile fiber                                     | 7     | 1.24842E-28 | 0.0002918   | 0.0001459   |
| GO:0005615 | CC       | extracellular space                                   | 3     | 7.89242E-53 | 0.000358    | 0.000179    |
| GO:0032501 | BP       | multicellular organismal process                      | 1     | 3.81019E-74 | 1.967E-06   | 9.834E-07   |
| GO:0050896 | BP       | response to stimulus                                  | 1     | 7.80417E-63 | 2.99E-05    | 1.495E-05   |
| GO:0044707 | BP       | single-multicellular organism process                 | 2     | 4.25127E-69 | 6.816E-05   | 3.408E-05   |
| GO:0007588 | BP       | excretion                                             | 4     | 2.14248E-05 | 5.45E-05    | 3.796E-05   |
| GO:0003407 | BP       | neural retina development                             | 10    | 2.32321E-05 | 0.0002895   | 0.0001563   |
| GO:0006305 | BP       | DNA alkylation                                        | 8     | 3.16666E-06 | 0.0003543   | 0.0001787   |
| GO:0006306 | BP       | DNA methylation                                       | 9     | 3.16666E-06 | 0.0003543   | 0.0001787   |
| GO:0003835 | MF       | beta-galactoside alpha-2,6-sialyltransferase activity | 5     | 2.6925E-15  | 2.002E-07   | 1.001E-07   |

\*BP: biological\_process; CC; CC: cellular\_component; MF: molecular\_function

**Supplementary Table S2. Common GO terms regulated by DE miRNAs in late CP and early CP**

| pathwayId  | pathwayName                                                |
|------------|------------------------------------------------------------|
| path:00071 | Fatty acid metabolism                                      |
| path:04010 | MAPK signaling pathway                                     |
| path:04012 | ErbB signaling pathway                                     |
| path:04020 | Calcium signaling pathway                                  |
| path:04120 | Ubiquitin mediated proteolysis                             |
| path:04141 | Protein processing in endoplasmic reticulum                |
| path:04142 | Lysosome                                                   |
| path:04144 | Endocytosis                                                |
| path:04150 | mTOR signaling pathway                                     |
| path:04210 | Apoptosis                                                  |
| path:04310 | Wnt signaling pathway                                      |
| path:04360 | Axon guidance                                              |
| path:04510 | Focal adhesion                                             |
| path:04666 | Fc gamma R-mediated phagocytosis                           |
| path:04722 | Neurotrophin signaling pathway                             |
| path:04810 | Regulation of actin cytoskeleton                           |
| path:04910 | Insulin signaling pathway                                  |
| path:04916 | Melanogenesis                                              |
| path:05100 | Bacterial invasion of epithelial cells                     |
| path:05120 | Epithelial cell signaling in Helicobacter pylori infection |
| path:05200 | Pathways in cancer                                         |
| path:05212 | Pancreatic cancer                                          |
| path:05214 | Glioma                                                     |
| path:05215 | Prostate cancer                                            |
| path:05218 | Melanoma                                                   |
| path:05220 | Chronic myeloid leukemia                                   |
| path:05222 | Small cell lung cancer                                     |
| path:05223 | Non-small cell lung cancer                                 |

**Supplementary Table S3. Common pathways regulated by DEmiRs of late CP and early CP.**

| <b>miRNAs</b>         | <b>Primers</b> | <b>Sequences</b>       |
|-----------------------|----------------|------------------------|
| <b>Control</b>        | P1-F           | TGAGAAGTCCGTCACACACCA  |
|                       | P1-R           | TAAGTCGTCTGTCAGCAGCAC  |
| <b>hsa-miR-130a</b>   | h-P130a-F      | TGAGAAGTCCGTCACACACCA  |
|                       | h-P130a-R      | GGCGACAGTGCAATGTTAA    |
| <b>hsa-miR-221</b>    | h-P221-3p-F    | AGTCACATCTACATTGTCTGC  |
|                       | h-P221-3p-R    | TGAGAAGTCCGTCACACACCA  |
| <b>hsa-miR-320a/b</b> | h-P320a/b-F    | CACAAAAGCTGGGTTGAGAGG  |
|                       | h-P320-R       | TGAGAAGTCCGTCACACACCA  |
| <b>hsa-miR-320c/d</b> | h-P320c/d-F    | CAGTAGGAAAAGCTGGGTTGAG |
|                       | h-P320-R       | TGAGAAGTCCGTCACACACCA  |

**Supplementary Table S4. List of miRNA-specific primer sequences**

## **Appendix 1. M-ANNHEIM clinical staging of chronic pancreatitis.**

### Asymptomatic chronic pancreatitis

#### Stage 0 of subclinical chronic pancreatitis

- a. Period without symptoms (determination by chance, eg, autopsy)
- b. Acute pancreatitisVsingle episode (possible onset of chronic pancreatitis)
- c. Acute pancreatitis with severe complications

### Symptomatic chronic pancreatitis

#### Stage 1 without pancreatic insufficiency

- a. (Recurrent) acute pancreatitis (no pain between episodes of acute pancreatitis)
- b. Recurrent or chronic abdominal pain (including pain between episodes of acute pancreatitis)
- c. 1a/b with severe complications

#### Stage 2 of partial pancreatic insufficiency

- a. Isolated exocrine (or endocrine) pancreatic insufficiency (without pain)
- b. Isolated exocrine (or endocrine) pancreatic insufficiency (with pain)
- c. 2a/b with severe complications

#### Stage 3 of painful complete pancreatic insufficiency

- a. Exocrine and endocrine insufficiency (with pain, e.g. requiring pain medication)
- b. 3a with severe complications

#### Stage 4 of secondary painless disease (burnout)

- a. Exocrine and endocrine insufficiency without pain and without severe complications
- b. Exocrine and endocrine insufficiency without pain and with severe complications

## **Supplementary Figures Legends**

**Supplementary Figure S1. GO functional enrichment for the targets of DEmiRs in early CP**

**Supplementary Figure S2. The enriched GO terms of DEmiRs in early CP and late CP and their hierarchical relationships in molecular function**

**Supplementary Figure S3. The enriched GO terms of DEmiRs in early CP and late CP and their hierarchical relationships in molecular function**



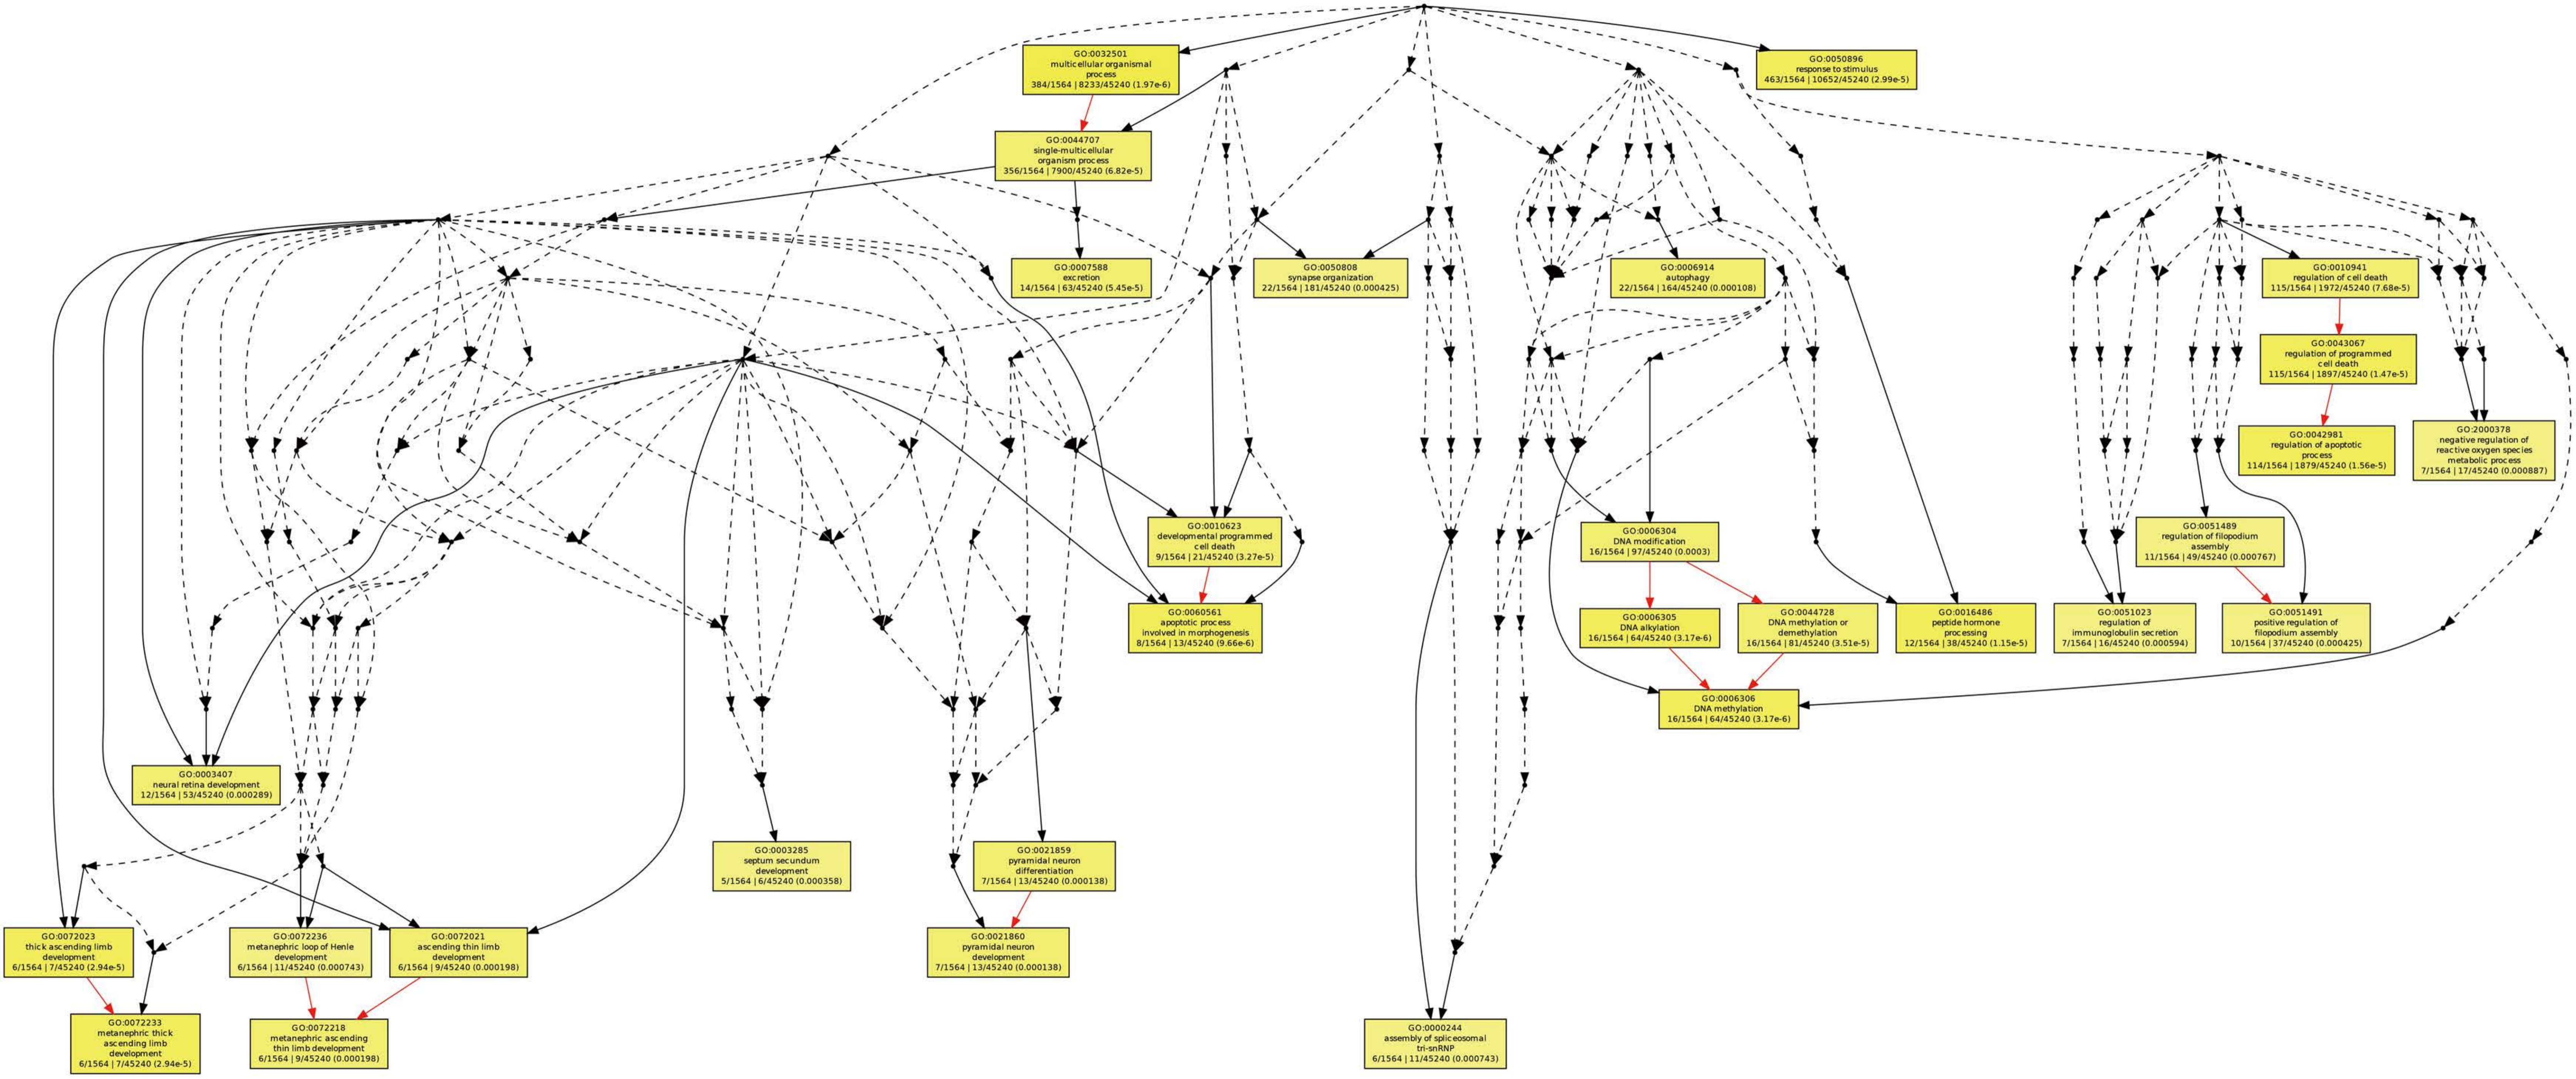

Supplement: srep40019-s1.pdf [file srep40019-s1.pdf]
